# Supplementary material for: Highly thermostable lanthanide metal–organic frameworks exhibiting unique selectivity for nitro explosives
Source: Royal Society of Chemistry journal article supplement (doi:10.1039/c4ra13773f), 2014-11-21
Supplement: c4ra13773f1.pdf [file c4ra13773f1.pdf]

## Supporting Information

### Highly thermostable lanthanide metal-organic frameworks exhibiting unique selectivity for nitro explosives

Shu-Na Zhao,<sup>a,b</sup> Xue-Zhi Song,<sup>a,b</sup> Min Zhu,<sup>a,b</sup> Xing Meng,<sup>a,b</sup> Lan-Lan Wu,<sup>a,b</sup> Shu-Yan Song<sup>\*a</sup>,  
Cheng Wang<sup>\*a</sup> and Hong-Jie Zhang<sup>a</sup>

<sup>a</sup> State Key Laboratory of Rare Earth Resource Utilization, Changchun Institute of Applied  
Chemistry, Chinese Academy of Sciences, 5625 Renmin Street, Changchun 130022, China

Tel: +86-431-85262127; Fax: +86-431-85698041;

E-mail: [songsy@ciac.ac.cn](mailto:songsy@ciac.ac.cn); [cwang@ciac.ac.cn](mailto:cwang@ciac.ac.cn)

<sup>b</sup>University of Chinese Academy of Sciences, Beijing, 100049, China

## 1. Crystal data for LnL

**Table S1.** Crystal data and structure refinements of compound **1**

| Compound                                                                                                                                                | <b>1</b>                                                                       |
|---------------------------------------------------------------------------------------------------------------------------------------------------------|--------------------------------------------------------------------------------|
| formula                                                                                                                                                 | Gd <sub>2</sub> C <sub>67</sub> H <sub>70</sub> N <sub>2</sub> O <sub>14</sub> |
| fw                                                                                                                                                      | 1441.75                                                                        |
| <i>T</i> /K                                                                                                                                             | 293(2)                                                                         |
| $\lambda$ (Mo K $\alpha$ ), Å                                                                                                                           | 0.71073                                                                        |
| cryst syst                                                                                                                                              | monoclinic                                                                     |
| space group                                                                                                                                             | <i>C</i> 2/c                                                                   |
| <i>a</i> (Å)                                                                                                                                            | 23.321(5)                                                                      |
| <i>b</i> (Å)                                                                                                                                            | 15.408(4)                                                                      |
| <i>c</i> (Å)                                                                                                                                            | 18.286(4)                                                                      |
| $\alpha$ (deg)                                                                                                                                          | 90                                                                             |
| $\beta$ (deg)                                                                                                                                           | 98.309(4)                                                                      |
| $\gamma$ (deg)                                                                                                                                          | 90                                                                             |
| <i>V</i> /Å <sup>3</sup>                                                                                                                                | 6502(3)                                                                        |
| <i>Z</i>                                                                                                                                                | 4                                                                              |
| <i>D</i> <sub>calcd</sub> (g·cm <sup>-3</sup> )                                                                                                         | 1.473                                                                          |
| <i>F</i> (000)                                                                                                                                          | 2904                                                                           |
| 2 $\theta$ <sub>max</sub> (°)                                                                                                                           | 50.44                                                                          |
| GOF                                                                                                                                                     | 1.006                                                                          |
| <i>R</i> <sub><i>i</i></sub> ( <i>I</i> > 2 $\sigma$ ( <i>I</i> )) <sup>a</sup>                                                                         | 0.0343                                                                         |
| <i>wR</i> <sub>2</sub> <sup>b</sup> (all data)                                                                                                          | 0.0873                                                                         |
| <sup>a</sup> <i>R</i> <sub>1</sub> = $\Sigma  F_o  -  F_c  /\Sigma F_o $ , <i>wR</i> <sub>2</sub> = $[\Sigma( F_o ^2 -  F_c ^2)/\Sigma F_o ^2]^{1/2}$ . |                                                                                |

**Table S2.** The cell parameters of LnL compounds (Ln = Gd, Eu, Tb, Monoclinic,  $C2/c$ ,  $\alpha = \gamma = 90^\circ$ )

| Ln | $a/\text{\AA}$ | $b/\text{\AA}$ | $c/\text{\AA}$ | $\beta/^\circ$ | $V/\text{\AA}^3$ |
|----|----------------|----------------|----------------|----------------|------------------|
| Gd | 23.321(5)      | 15.408(4)      | 18.286(4)      | 98.309(4)      | 6502(3)          |
| Eu | 23.291(2)      | 15.3928(13)    | 18.2798(16)    | 98.298(2)      | 6484(81)         |
| Tb | 23.3356(15)    | 15.3735(9)     | 18.2341(11)    | 98.5230(10)    | 6469(24)         |

## 2. Additional figures for structural information of 1

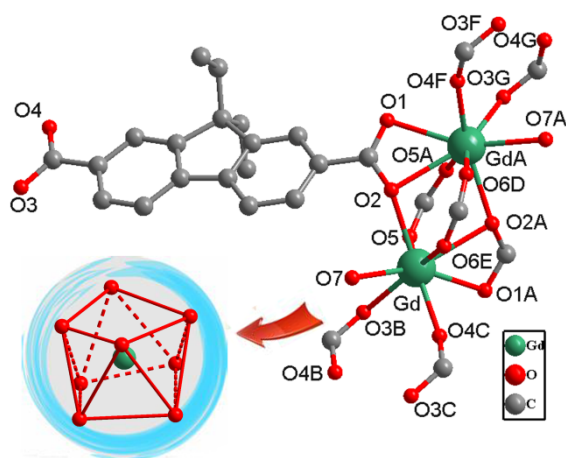

**Fig. S1** Local coordination environment of the  $\text{Gd}^{3+}$  ions in **1**. Hydrogen atoms attached to carbon atoms are omitted for clarity. Symmetry codes: A,  $1-x, y, 1.5-z$ ; B,  $0.5-x, 1.5-y, 1-z$ ; C,  $0.5+x, -0.5+y, z$ ; D,  $1-x, -1+y, 1.5-z$ ; E,  $x, -1+y, z$ ; F,  $0.5-x, -0.5+y, 1.5-z$ ; G,  $0.5+x, 1.5-y, 0.5+z$ .

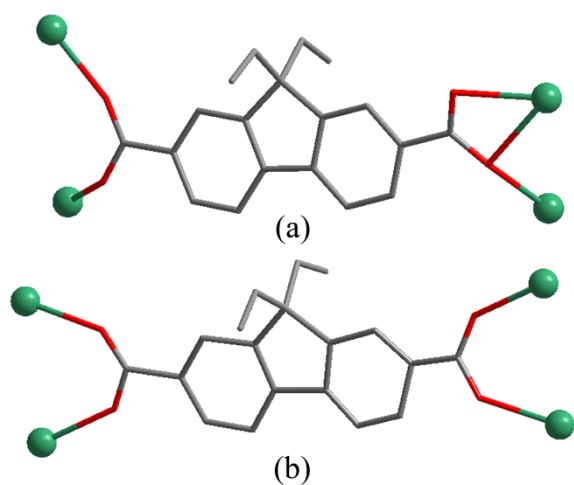

**Fig. S2** Coordination modes of carboxylate groups in  $\text{L}^{2-}$  ligand.

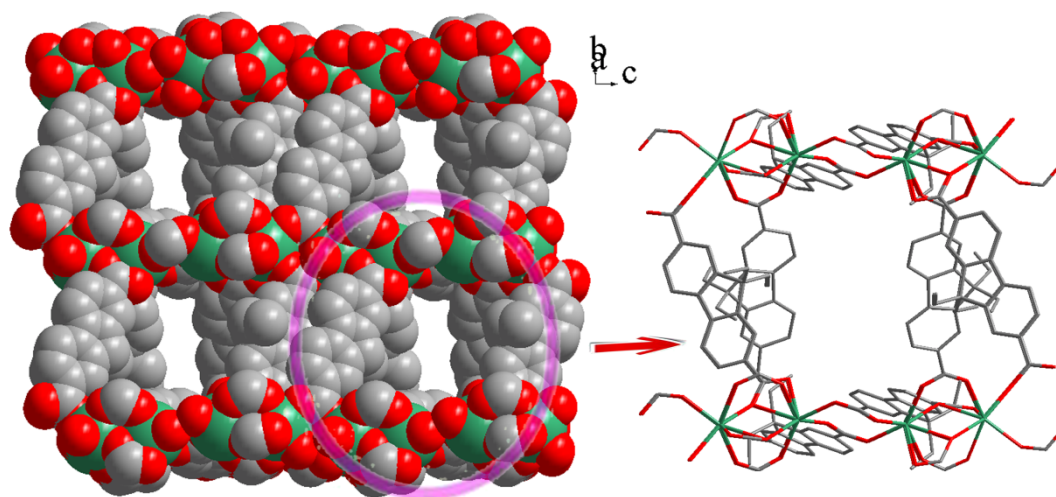

**Fig. S3** The 1D channel of **2a**.

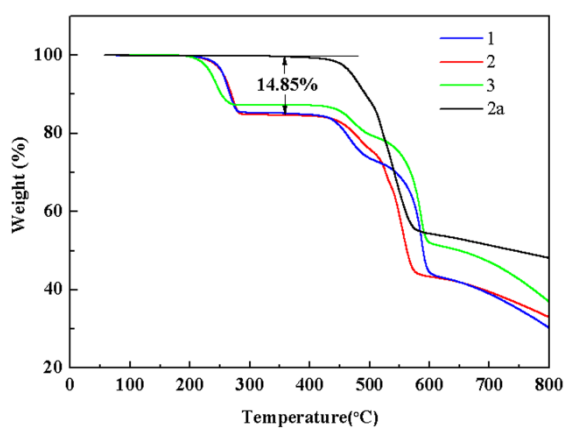

**Fig. S4** TGA curves of compounds **1**, **2**, **3** and **2a**

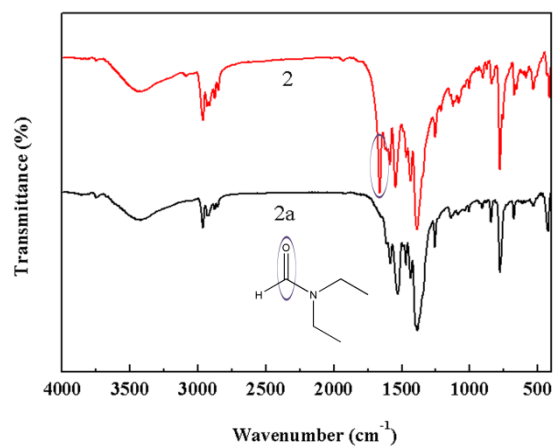

**Fig. S5** The FT-IR spectrum of compound **2** and **2a**

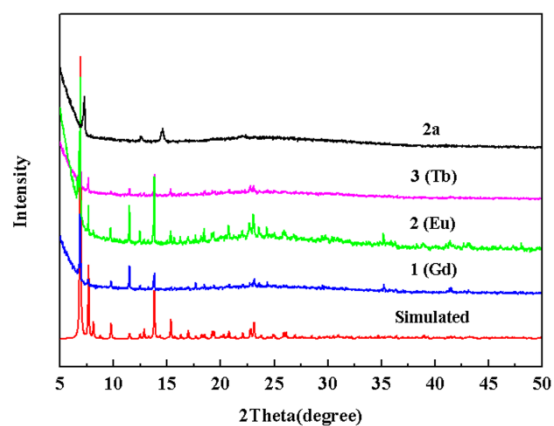

**Fig. S6** Power X-ray diffraction (PXRD) pattern of simulated and experimental as-synthesized compounds **1** (Gd), **2** (Eu), **3** (Tb) and **2a**

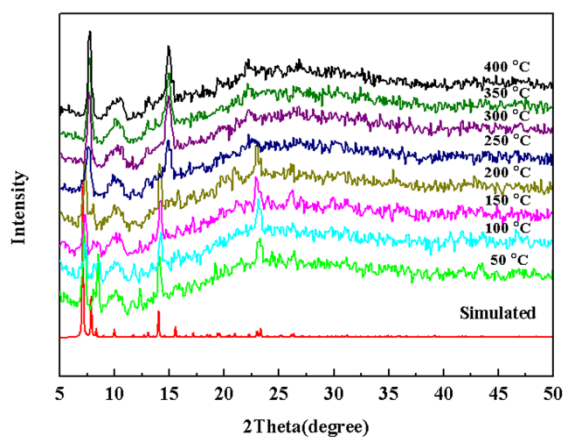

**Fig. S7** Power X-ray diffraction pattern of simulated and experimental as-synthesized compounds **2** from 50 °C to 400 °C

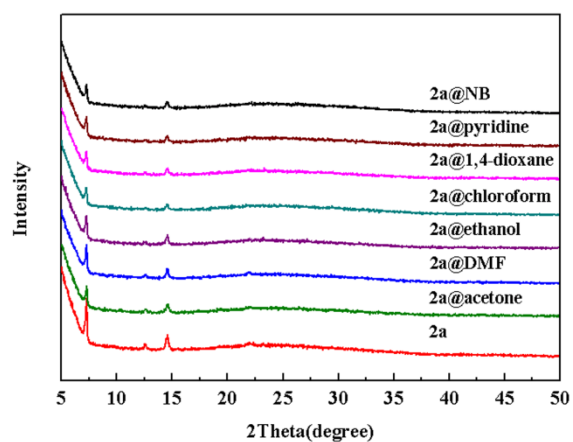

**Fig. S8** Powder X-ray diffraction pattern of the solvent treated samples of **2a** with respect to each other and comparison with simulated ones

### 3. Luminescent Measurements

#### Photoluminescent sensing experiments

#### Solvent molecules sensing experiments

The activated and fine grinding sample of **2a** (3 mg) was immersed in different pure organic solvents (5 mL). Then the sample was treated by ultrasonication for 3 h and then aged for 2 days to form a stable emulsion before the fluorescence study. The organic solvents are DMF, ethanol, 2-propanol, ethylacetate, 1-propanol, methanol, acetonitrile, 1,4-dioxane, cyclohexane, chloroform, tetrahydrofuran, dichloromethane, acetone.

#### Aromatic compounds sensing experiments

The activated and fine grinding sample of **2a** (3 mg) was immersed in DMF (5 mL), treated by ultrasonication for 1 h. Then equal volume (25  $\mu$ L) of aromatic molecules was added into the above samples. Finally, stable emulsion was formed by ultrasonication for additional 3 h and then aged for 2 days before the fluorescence study. The aromatic compounds are benzene (Bz), toluene (Tol), nitrobenzene (NB), chlorobenzene (ClBz), bromobenzene (BrBz), aniline, methylphenyl ether (MeO-Bz), and *p*-xylene.

#### Nitroaromatic explosives sensing experiments

The activated and fine grinding sample of **2a** (3 mg) was immersed in the freshly prepared analyte solutions (1 mmol/L in DMF, 5mL). Then the sample was treated by ultrasonication for 3 h and then aged for 2 days to form a stable emulsion before the fluorescence study. The nitroaromatic explosives are 2,4,6-trinitrophenol (TNP), 4-nitrophenol (4-NP), 3-nitrophenol (3-NP), *o*-nitrotoluene (*o*-NT), *m*-nitrotoluene (*m*-NT), nitrobenzene (NB) and nitromethane (NM).

#### 2,4,6-trinitrophenol (TNP) sensing experiments (vapor)

The quartz slide was rinsed by de-ionized water and ethanol, and then was dried. A layer of approximately 0.3 mg of solid sample (prior ground into fine power) was deposited on the quartz slide. About 1 g TNP solid sample was placed into a small open vial and the vial was

placed into a bigger capped bottle for several days before the fluorescence sensing experiments to ensure that the equilibrated vapor pressure was reached. The original fluorescence spectra of the layer was collected before placing the slide into the bottle containing the analyte. At the specified exposure time, the slide was taken out and without any delay mounted to the sample holder of the fluorescence spectrophotometer and the fluorescence spectrum was recorded.

*Caution!* 2,4,6-trinitrophenol (TNP) is potentially explosive and should be handled with the necessary precautions.

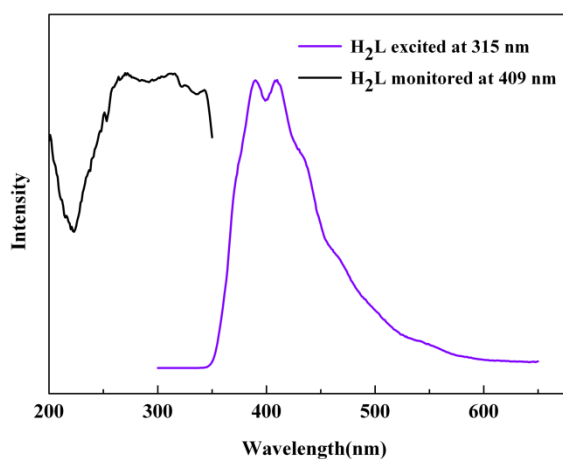

**Fig. S9** Room-temperature excitation and emission spectra of compound  $H_2L$  in the solid state

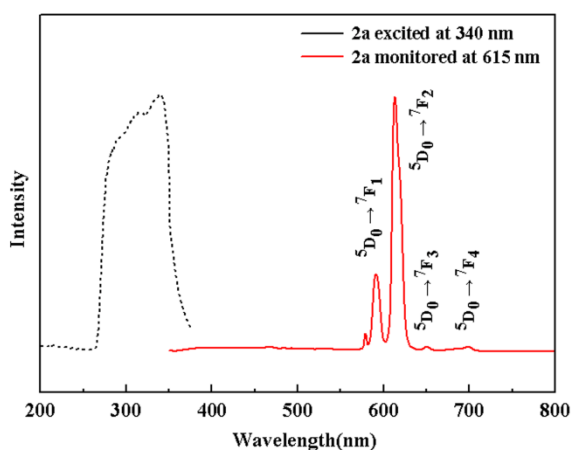

**Fig. S10** Room-temperature excitation and emission spectra of compound  $2a$  in the solid state

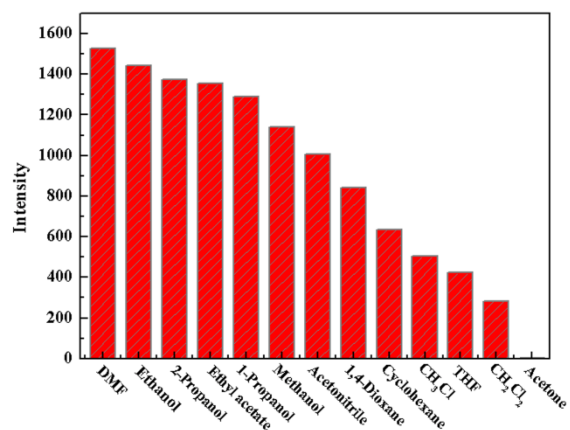

**Fig. S11** Photoluminescence spectra of in different solvents. Excitation: 310 nm.

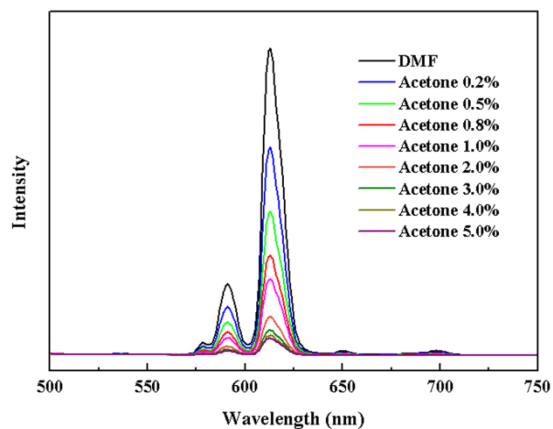

**Fig. S12** The photoluminescence spectra of 2a DMF emulsion in the presence of various contents of acetone solvent.

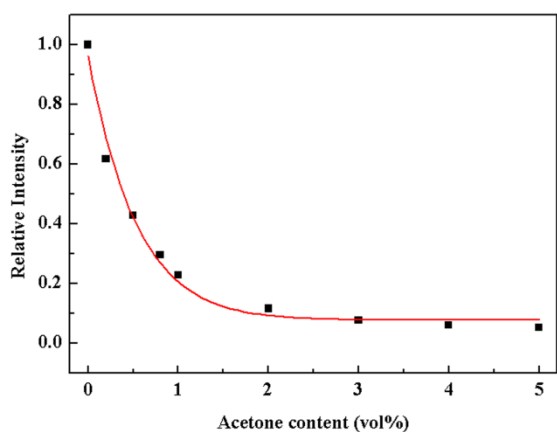

**Fig. S13** The photoluminescence relative intensity (the photoluminescence intensity of acetone-incorporated **2a**/acetone-free **2a** at 615 nm) of the **2a** DMF emulsion as a function of acetone content

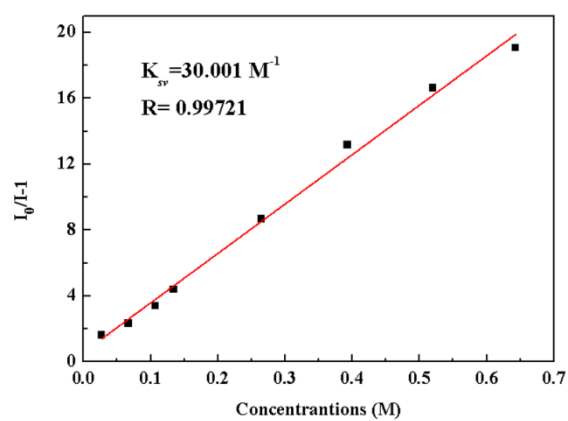

**Fig. S14** Stern-Volmer plot for the quenching of **2a** by acetone.

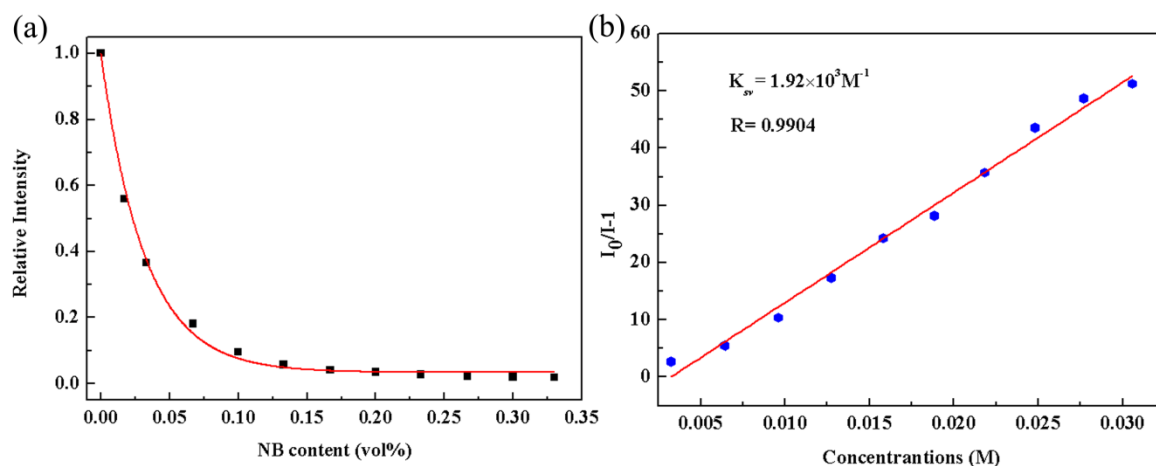

**Fig. S15** (a) The photoluminescence relative intensity (the photoluminescence intensity of NB-incorporated **2a**/NB-free **2a** at 615 nm) of the **2a** DMF emulsion as a function of NB content (b) Stern-Volmer plot for the quenching of **2a** by NB.

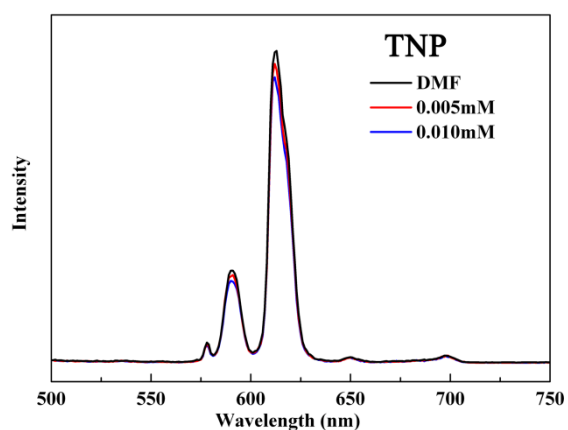

**Fig. S16** Reduction in emission intensity of **2a** upon addition of TNP solution in DMF.

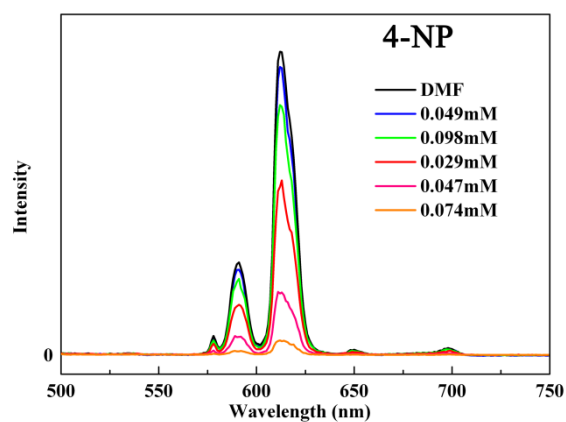

**Fig. S17** Emission spectra of **2a** dispersed in DMF upon incremental addition of 4-NP solution in DMF.

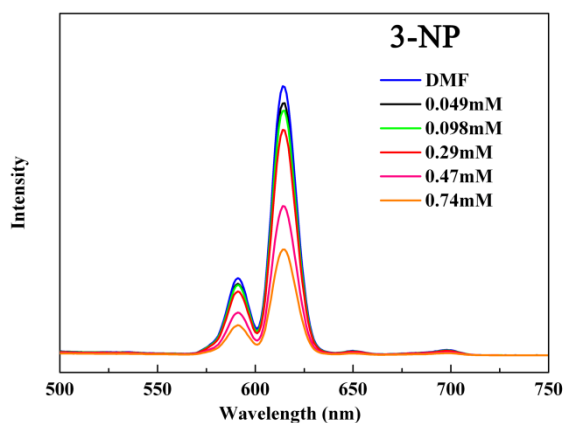

**Fig. S18** Emission spectra of **2a** dispersed in DMF upon incremental addition of 3-NP solution in DMF.

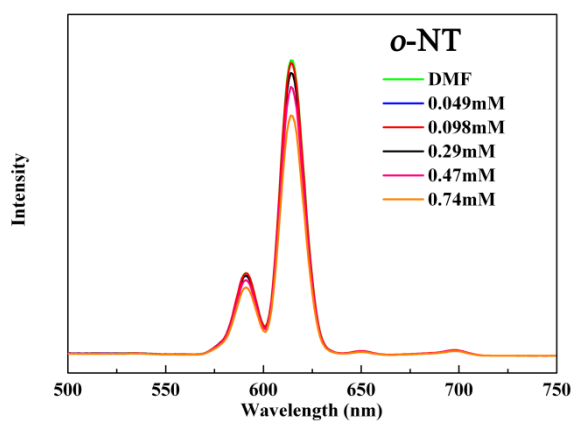

**Fig. S19** Emission spectra of **2a** dispersed in DMF upon incremental addition of *o*-NT solution in DMF.

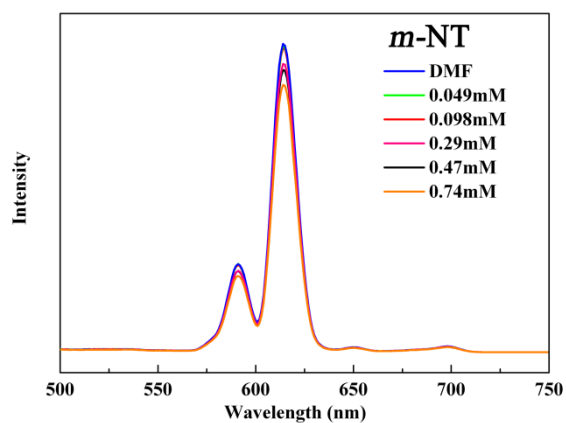

**Fig. S20** Emission spectra of **2a** dispersed in DMF upon incremental addition of *m*-NT solution in DMF.

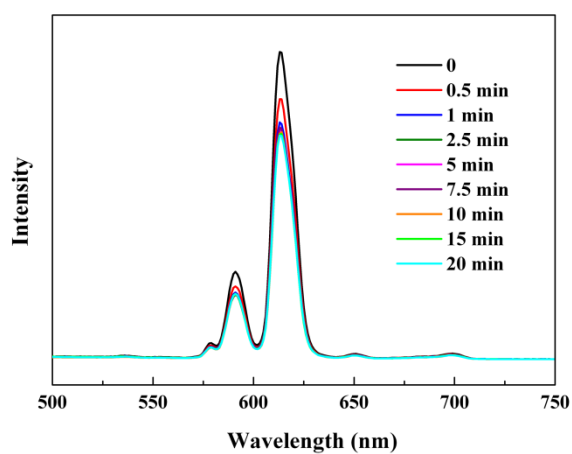

**Fig. S21** Time-dependent emission spectra upon exposure of **2a** to TNP vapor.

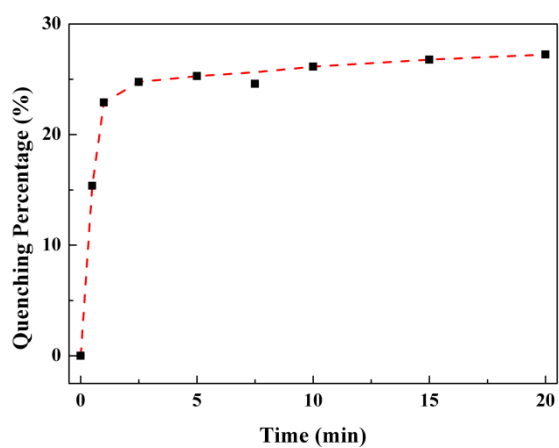

**Fig. S22** Time-dependent fluorescence quenching percentage by TNP vapor.

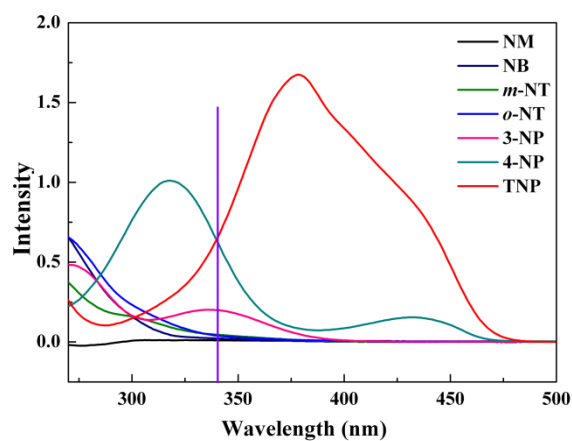

**Fig. S23** The UV-vis absorption spectra of nitro compounds with the same concentration of analytes (0.1 mM, in DMF).

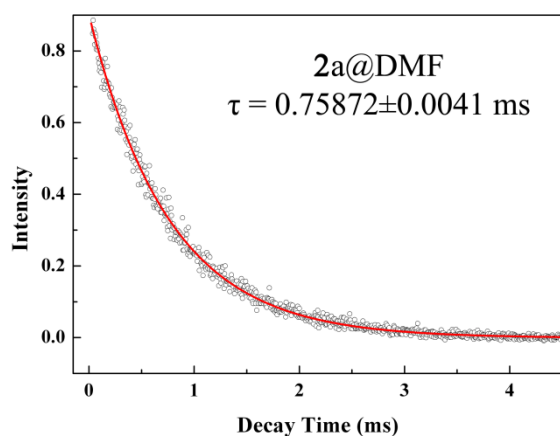

**Fig. S24** Luminescence decay curve for the  $^5D_0 \rightarrow ^7F_2$  (615 nm) emission of **2a** in DMF.

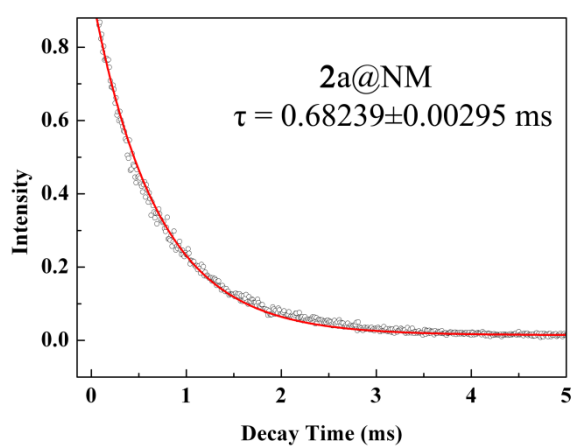

**Fig. S25** Luminescence decay curve for the  $^5D_0 \rightarrow ^7F_2$  (615 nm) emission of **2a@NM** in DMF.

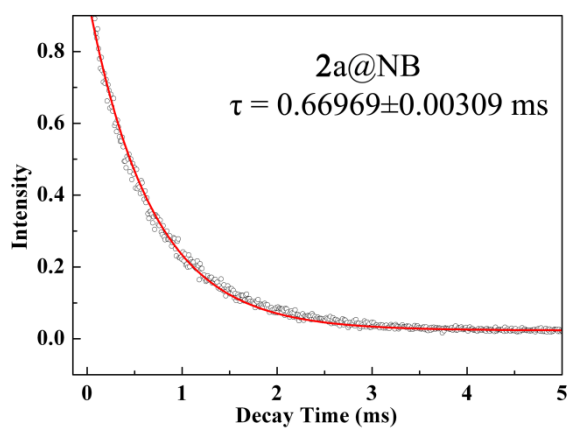

**Fig. S26** Luminescence decay curve for the  $^5D_0 \rightarrow ^7F_2$  (615 nm) emission of **2a@NB** in DMF.

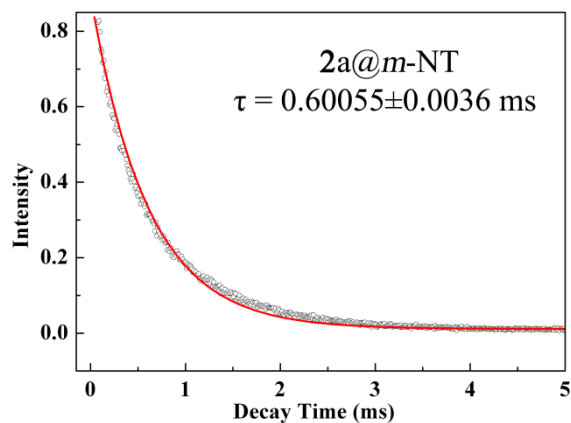

**Fig. S27** Luminescence decay curve for the  $^5D_0 \rightarrow ^7F_2$  (615 nm) emission of **2a@m-NT** in DMF.

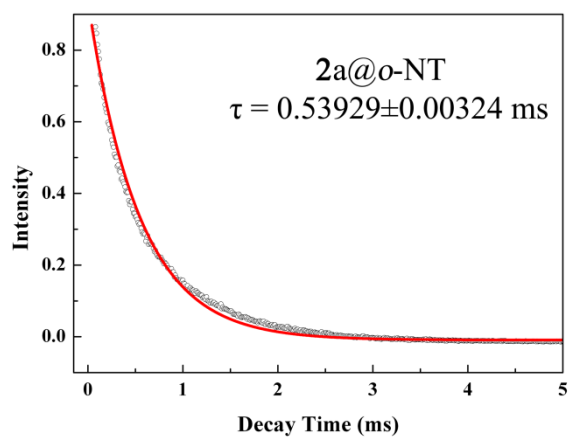

**Fig. S28** Luminescence decay curve for the  $^5D_0 \rightarrow ^7F_2$  (615 nm) emission of **2a@o-NT** in DMF.

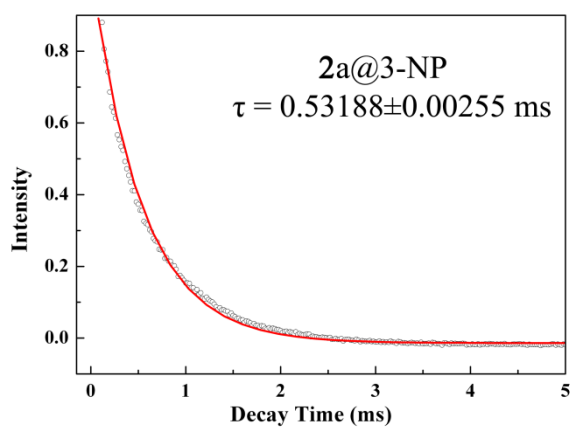

**Fig. S29** Luminescence decay curve for the  $^5D_0 \rightarrow ^7F_2$  (615 nm) emission of **2a@3-NP** in DMF.

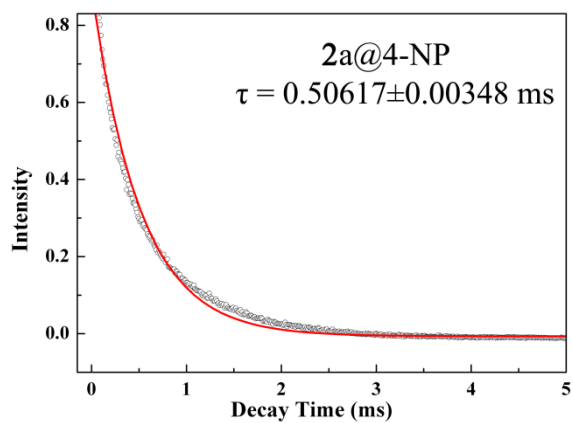

**Fig. S30** Luminescence decay curve for the  $^5D_0 \rightarrow ^7F_2$  (615 nm) emission of **2a@4-NP** in DMF.

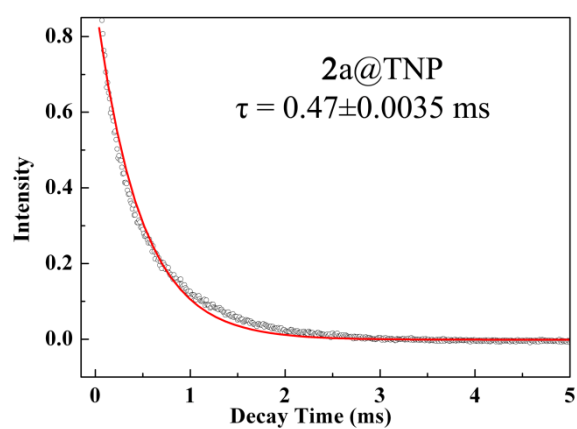

**Fig. S31** Luminescence decay curve for the  $^5D_0 \rightarrow ^7F_2$  (615 nm) emission of **2a@TNP** in DMF.

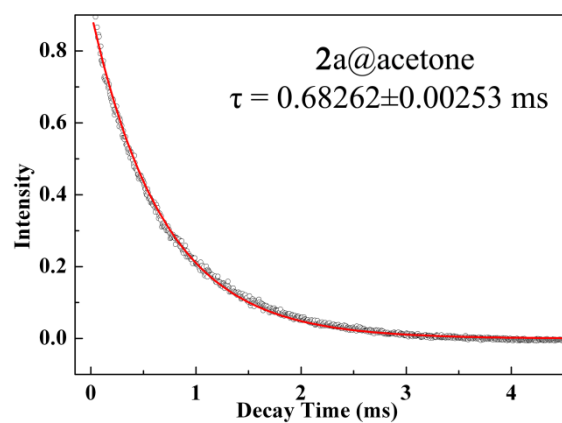

**Fig. S32** Luminescence decay curve for the  $^5D_0 \rightarrow ^7F_2$  (615 nm) emission of **2a** in acetone.
